# Supplementary material
Source: PubMed Central journal article supplement (PMC3640590)
Supplement: NIHMS419826-supplement-01.pdf [file NIHMS419826-supplement-01.pdf]

**ONLINE APPENDIX: SUPPLEMENTAL TABLES**

**Table A1: Sample Characteristics**

|                       | <u>%</u> | <u>n</u> |                             | <u>%</u> | <u>n</u> |
|-----------------------|----------|----------|-----------------------------|----------|----------|
| <u>Sex</u>            |          |          | <u>Marital Status</u>       |          |          |
| Male                  | 92.2%    | 2,970    | Never married               | 66.4%    | 2,139    |
| Female                | 7.8%     | 251      | Married                     | 12.1%    | 390      |
|                       |          |          | Divorced or separated       | 20.4%    | 656      |
| <u>Age</u>            |          |          | Other                       | 1.1%     | 36       |
| 17-25                 | 18.3%    | 591      | <u>#Dependents</u>          |          |          |
| 26-30                 | 16.7%    | 539      | 0                           | 40.2%    | 1,294    |
| 31-35                 | 17.4%    | 560      | 1                           | 22.6%    | 727      |
| 36-40                 | 17.0%    | 548      | 2                           | 18.0%    | 581      |
| 41-45                 | 13.4%    | 432      | 3                           | 10.6%    | 342      |
| 46-50                 | 10.5%    | 339      | 4+                          | 8.6%     | 277      |
| 51-89                 | 6.6%     | 212      | <u>Prison Terms</u>         |          |          |
| <u>Race</u>           |          |          | 1                           | 47.3%    | 1,525    |
| White                 | 45.0%    | 1,448    | 2                           | 26.0%    | 839      |
| Black                 | 53.0%    | 1,708    | 3 or 4                      | 20.4%    | 657      |
| Other race            | 2.0%     | 65       | 5 or more                   | 6.2%     | 200      |
| <u>Education</u>      |          |          | <u>Sex offender</u>         | 7.6%     | 244      |
| No high school        | 7.0%     | 226      | <u>Known mental illness</u> | 20.8%    | 669      |
| Some high school      | 35.0%    | 1,128    |                             |          |          |
| GED                   | 30.4%    | 979      |                             |          |          |
| High school           | 20.4%    | 656      |                             |          |          |
| More than high school | 6.0%     | 194      |                             |          |          |
| Missing               | 1.2%     | 38       |                             |          |          |

Sample n = 3,221

**Table A2: Observation Period Length, by Reason for Termination**

| Reason for Termination<br>of Observation Period | Latest Time Point Observed (with Row Percentages) |            |             |             |             |              |              |              |              |                          | Total           | Column<br>Percent |
|-------------------------------------------------|---------------------------------------------------|------------|-------------|-------------|-------------|--------------|--------------|--------------|--------------|--------------------------|-----------------|-------------------|
|                                                 | < 1<br>Month                                      | 1<br>Month | 3<br>Months | 6<br>Months | 9<br>Months | 12<br>Months | 15<br>Months | 18<br>Months | 21<br>Months | 24<br>Months<br>or Later |                 |                   |
| Discharge From Parole                           |                                                   | 4<br>0.2%  | 14<br>0.9%  | 20<br>1.2%  | 20<br>1.2%  | 60<br>3.7%   | 47<br>2.9%   | 81<br>5.1%   | 45<br>2.8%   | 1,311<br>81.8%           | 1,602<br>100.0% | 49.7%             |
| Return to Prison                                | 37<br>2.6%                                        | 86<br>6.0% | 113<br>7.9% | 99<br>7.0%  | 90<br>6.3%  | 66<br>4.6%   | 73<br>5.1%   | 57<br>4.0%   | 49<br>3.4%   | 754<br>52.9%             | 1,424<br>100.0% | 44.2%             |
| End of Observation<br>Period                    |                                                   |            |             |             |             |              |              |              |              | 86<br>100.0%             | 86<br>100.0%    | 2.7%              |
| Death                                           | 4<br>6.5%                                         | 3<br>4.8%  | 4<br>6.5%   | 1<br>1.6%   | 3<br>4.8%   | 2<br>3.2%    | 4<br>6.5%    | 3<br>4.8%    | 2<br>3.2%    | 36<br>58.1%              | 62<br>100.0%    | 1.9%              |
| Absconding at end of<br>Observation Period      |                                                   |            |             |             |             |              |              |              |              | 47<br>100.0%             | 47<br>100.0%    | 1.5%              |
| Total                                           | 41<br>1.3%                                        | 93<br>2.9% | 131<br>4.1% | 120<br>3.7% | 113<br>3.5% | 128<br>4.0%  | 124<br>3.8%  | 141<br>4.4%  | 96<br>3.0%   | 2,234<br>69.4%           | 3,221<br>100.0% | 100.0%            |

**Table A3: Post-Release Residences with Undefined Distances to Pre-Prison Address, by Time**

|                            | First Address |    | 6 Months |     | 12 Months |     | 18 Months |      | 24 Months |      |
|----------------------------|---------------|----|----------|-----|-----------|-----|-----------|------|-----------|------|
| No Community Exposure      | 1.3%          | 42 | 7.0%     | 225 | 7.0%      | 226 | 5.2%      | 166  | 3.7%      | 119  |
| Out of State               | 0.0%          | 1  | 0.5%     | 17  | 0.6%      | 19  | 0.6%      | 18   | 0.6%      | 18   |
| Pre-Prison Out of State    | 1.5%          | 47 | 1.0%     | 31  | 0.7%      | 23  | 0.7%      | 21   | 0.6%      | 18   |
| Unknown Address            | 2.7%          | 86 | 7.5%     | 241 | 7.7%      | 247 | 6.8%      | 220  | 5.7%      | 185  |
| Unknown Pre-Prison Address | 0.5%          | 15 | 0.4%     | 12  | 0.3%      | 11  | 0.2%      | 8    | 0.2%      | 6    |
| Censored                   |               |    | 13.8%    | 445 | 26.0%     | 837 | 38.0%     | 1223 | 48.3%     | 1557 |

Notes: No community exposure residences include hospitals, jails, correctional centers, and other intermediate sanctions

**Table A4: Return to Pre-Prison Residence, by Time and Demographic Groups**

|                                | <u>First</u><br><u>Address</u> | <u>3</u><br><u>Months</u> | <u>6</u><br><u>Months</u> | <u>12</u><br><u>Months</u> | <u>18</u><br><u>Months</u> | <u>24</u><br><u>Months</u> | <u>Ever</u><br><u>Return</u> |
|--------------------------------|--------------------------------|---------------------------|---------------------------|----------------------------|----------------------------|----------------------------|------------------------------|
| All Parolees                   | 25.5%                          | 25.2%                     | 24.6%                     | 22.2%                      | 21.2%                      | 20.4%                      | 33.9%                        |
| Whites                         | 25.8%                          | 19.9%                     | 23.7%                     | 21.2%                      | 19.9%                      | 19.9%                      | 34.5%                        |
| Blacks                         | 25.4%                          | 22.4%                     | 25.3%                     | 23.2%                      | 22.4%                      | 22.4%                      | 33.3%                        |
| Men                            | 26.3%                          | 26.1%                     | 25.5%                     | 23.1%                      | 22.0%                      | 21.3%                      | 34.7%                        |
| Women                          | 16.3%                          | 14.5%                     | 14.6%                     | 12.5%                      | 12.1%                      | 10.6%                      | 25.1%                        |
| Age 17-25                      | 29.7%                          | 30.4%                     | 30.6%                     | 25.2%                      | 23.8%                      | 22.9%                      | 39.1%                        |
| Age 26-35                      | 24.1%                          | 23.7%                     | 23.0%                     | 21.1%                      | 20.7%                      | 20.3%                      | 32.3%                        |
| Age 36-45                      | 25.1%                          | 24.9%                     | 23.5%                     | 21.8%                      | 20.5%                      | 19.0%                      | 33.5%                        |
| Over 45                        | 24.8%                          | 23.4%                     | 23.7%                     | 22.3%                      | 20.9%                      | 20.2%                      | 32.7%                        |
| <u>Pre-Prison Neighborhood</u> |                                |                           |                           |                            |                            |                            |                              |
| Central City Poor              | 22.6%                          | 22.2%                     | 21.5%                     | 19.7%                      | 16.8%                      | 16.7%                      | 30.0%                        |
| Central City Non-Poor          | 30.1%                          | 28.1%                     | 26.2%                     | 24.1%                      | 23.6%                      | 24.9%                      | 39.4%                        |
| Suburb Poor                    | 25.1%                          | 25.4%                     | 29.6%                     | 22.6%                      | 26.1%                      | 27.5%                      | 37.1%                        |
| Suburb Non-Poor                | 28.0%                          | 27.7%                     | 27.3%                     | 25.3%                      | 25.9%                      | 23.3%                      | 36.8%                        |
| Rural                          | 24.7%                          | 25.7%                     | 23.4%                     | 19.6%                      | 15.1%                      | 12.6%                      | 33.0%                        |

**Table A5: Mean and Median Distance to Pre-Prison Address, by Time and Demographic Groups**

|                                |               | First<br>Address | 3<br>Months | 6<br>Months | 12<br>Months | 18<br>Months | 24<br>Months | Time-<br>Weighted<br>Full Spell |
|--------------------------------|---------------|------------------|-------------|-------------|--------------|--------------|--------------|---------------------------------|
| All Parolees                   | mean          | 15.6             | 13.4        | 14.0        | 14.4         | 14.8         | 14.8         | 14.0                            |
|                                | <i>median</i> | <i>2.9</i>       | <i>2.7</i>  | <i>2.9</i>  | <i>3.1</i>   | <i>3.2</i>   | <i>3.2</i>   | <i>3.0</i>                      |
|                                | n             | 3,021            | 2,598       | 2,243       | 1,852        | 1,560        | 1,317        |                                 |
| Whites                         |               | 21.5             | 18.5        | 18.9        | 20.3         | 20.9         | 20.1         | 19.0                            |
|                                |               | <i>4.6</i>       | <i>4.2</i>  | <i>4.2</i>  | <i>4.6</i>   | <i>5.1</i>   | <i>4.9</i>   | <i>4.6</i>                      |
| Blacks                         |               | 10.4             | 8.5         | 9.2         | 8.7          | 9.0          | 9.6          | 9.3                             |
|                                |               | <i>2.2</i>       | <i>2.0</i>  | <i>2.2</i>  | <i>2.2</i>   | <i>2.2</i>   | <i>2.3</i>   | <i>2.2</i>                      |
| Men                            |               | 14.5             | 13.2        | 13.6        | 14.2         | 14.5         | 14.7         | 13.7                            |
|                                |               | <i>2.9</i>       | <i>2.6</i>  | <i>2.8</i>  | <i>3.0</i>   | <i>3.1</i>   | <i>3.2</i>   | <i>2.9</i>                      |
| Women                          |               | 28.9             | 16.3        | 17.7        | 16.8         | 18.1         | 15.5         | 18.0                            |
|                                |               | <i>4.3</i>       | <i>2.9</i>  | <i>3.5</i>  | <i>3.7</i>   | <i>4.0</i>   | <i>4.0</i>   | <i>3.8</i>                      |
| Age 17-25                      |               | 16.5             | 14.8        | 14.9        | 18.0         | 17.8         | 18.3         | 14.5                            |
|                                |               | <i>2.3</i>       | <i>1.9</i>  | <i>2.2</i>  | <i>3.1</i>   | <i>3.4</i>   | <i>2.9</i>   | <i>2.4</i>                      |
| Age 26-35                      |               | 14.9             | 11.8        | 12.6        | 11.3         | 11.8         | 11.9         | 13.0                            |
|                                |               | <i>2.9</i>       | <i>2.6</i>  | <i>2.8</i>  | <i>2.8</i>   | <i>2.9</i>   | <i>2.8</i>   | <i>2.9</i>                      |
| Age 36-45                      |               | 15.5             | 13.9        | 14.6        | 16.0         | 16.2         | 15.4         | 14.7                            |
|                                |               | <i>3.1</i>       | <i>3.2</i>  | <i>3.5</i>  | <i>3.6</i>   | <i>3.6</i>   | <i>3.7</i>   | <i>3.4</i>                      |
| Over 45                        |               | 16.5             | 14.5        | 14.6        | 14.5         | 15.4         | 16.4         | 14.7                            |
|                                |               | <i>3.4</i>       | <i>2.9</i>  | <i>2.8</i>  | <i>2.8</i>   | <i>3.1</i>   | <i>4.0</i>   | <i>3.0</i>                      |
| <u>Pre-Prison Neighborhood</u> |               |                  |             |             |              |              |              |                                 |
| Central City Poor              |               | 11.2             | 9.4         | 10.2        | 9.9          | 11.0         | 10.9         | 10.0                            |
|                                |               | <i>2.4</i>       | <i>2.2</i>  | <i>2.5</i>  | <i>2.5</i>   | <i>2.7</i>   | <i>2.8</i>   | <i>2.4</i>                      |
| Central City Non-Poor          |               | 9.7              | 9.1         | 9.3         | 10.2         | 9.5          | 8.6          | 9.7                             |
|                                |               | <i>2.3</i>       | <i>2.2</i>  | <i>2.5</i>  | <i>3.0</i>   | <i>2.8</i>   | <i>2.3</i>   | <i>2.6</i>                      |
| Suburb Poor                    |               | 15.1             | 12.7        | 12.1        | 12.0         | 11.9         | 15.1         | 12.1                            |
|                                |               | <i>1.8</i>       | <i>1.4</i>  | <i>1.4</i>  | <i>1.6</i>   | <i>1.6</i>   | <i>1.8</i>   | <i>1.5</i>                      |
| Suburb Non-Poor                |               | 16.8             | 14.0        | 14.1        | 15.5         | 16.2         | 15.2         | 14.7                            |
|                                |               | <i>4.5</i>       | <i>3.9</i>  | <i>3.7</i>  | <i>3.9</i>   | <i>4.3</i>   | <i>4.5</i>   | <i>4.2</i>                      |
| Rural                          |               | 36.9             | 32.1        | 33.7        | 32.6         | 34.9         | 34.9         | 33.0                            |
|                                |               | <i>7.6</i>       | <i>5.4</i>  | <i>7.8</i>  | <i>8.7</i>   | <i>9.1</i>   | <i>9.1</i>   | <i>7.6</i>                      |

Note: Includes only individuals living in Michigan prior to prison and excludes unknown residences and those without community exposure
